# Supplementary material for: A Study of the Metabolic Pathways Affected by Gestational Diabetes Mellitus: Comparison with Type 2 Diabetes
Source: MDPI journal article supplement (doi:10.3390/diagnostics12112881), 2022-11-21
Supplement: s1 [file s1]

**Figure S1.** Representative 500 MHz  $^1\text{H}$ -NMR spectrum of deproteinized serum from a pregnant woman with GDM.

1, 2-Aminobutyrate; 2, 2-Hydroxybutyrate; 3, 2-Hydroxyisovalerate; 4, 2-Oxocaproate; 5, 2-Oxoglutarate; 6, 2-Oxoisocaproate; 7, 3-Hydroxybutyrate; 8, 3-Hydroxyisobutyrate; 9, 3-Hydroxyisovalerate; 10, 3-Methyl-2-oxovalerate; 11, Acetate; 12, Acetoacetate; 13, Acetone; 14, Alanine; 15, Arginine; 16, Asparagine; 17, Aspartate; 18, Betaine; 19, Carnitine; 20, Choline; 21, Citrate; 22, Creatine; 23, Dimethylamine; 24, Formate; 25, Glutamate; 26, Glutamine; 27, Glycine; 28, Histidine; 29, Hypoxanthine; 30, Inosine; 31, Isobutyrate; 32, Isoleucine; 33, Lactate; 34, Leucine; 35, Lysine; 36, Malonate; 37, Mannose; 38, Methanol; 39, Methionine; 40, Myo-inositol; 41, N,N-Dimethylglycine; 42, O-Acetylcarnitine; 43, Ornithine; 44, Phenylalanine; 45, Proline, 46, Pyruvate; 47, Sarcosine; 48, Serine; 49, Succinate; 50, Taurine; 51, Threonine; 52, Trimethylamine N-oxide; 53, Tryptophan; 54, Tyrosine; 55, Valine; Glu, Glucose; Creat, Creatinine.

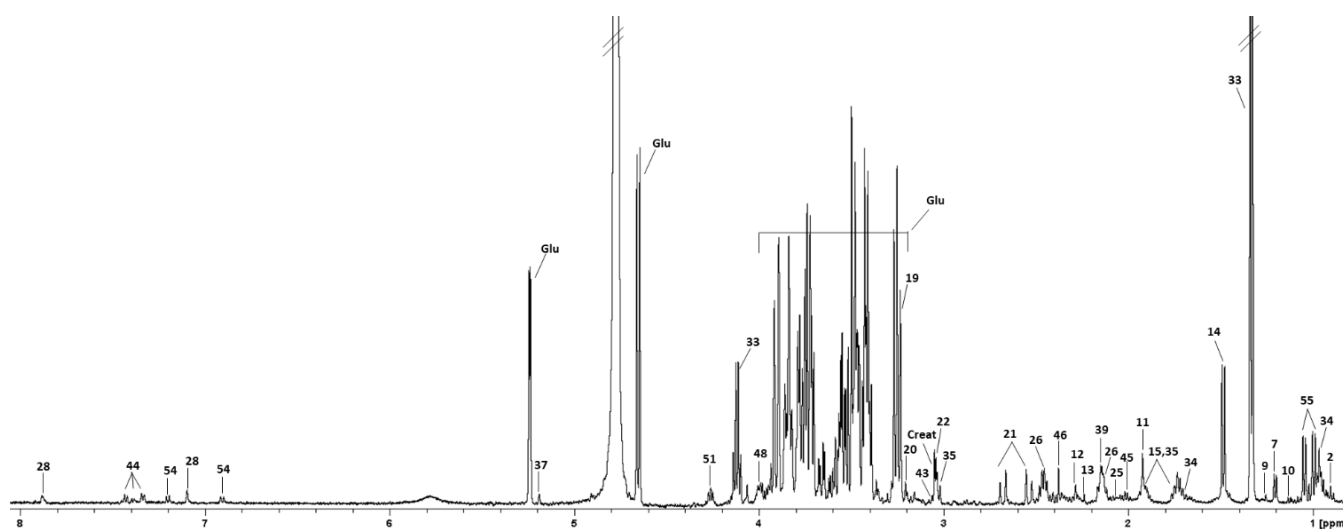

**Table S1: Assignment**

| Metabolites            | $\delta$ (H1 shift) ppm                                               | Multiplicity                                                | HMDB ID       |
|------------------------|-----------------------------------------------------------------------|-------------------------------------------------------------|---------------|
| 2-Aminobutyrate        | 0,984 ; 1,904 ; 3,723                                                 | t(CH3) ; m(CH2) ; dd(CH)                                    | (HMDB0000452) |
| 2-Hydroxybutyrate      | 0,903 ; 1,641 ; 1,734 ; 4,001                                         | t(CH3) ; m(CH2) ; m(CH2) ; dd(CH)                           | (HMDB0000008) |
| 2-Hydroxyisovalerate   | 0,838 ; 0,961 ; 2,021 ; 3,854                                         | d(CH3) ; d(CH3) ; m(CH) ; d(CH)                             | (HMDB0000407) |
| 2-Oxocaproate          | 0,897 ; 1,336 ; 1,578 ; 2,733                                         | t(CH3) ; m(CH2) ; m(CH2) ; t(CH2)                           | (HMDB0001864) |
| 2-Oxoglutarate         | 2,428 ; 3,007                                                         | t(CH2) ; t(CH2)                                             | (HMDB0000208) |
| 2-Oxoisocaproate       | 0,941 ; 2,099 ; 2,617                                                 | d(CH3)2 ; m(CH) ; d(CH2)                                    | (HMDB0000695) |
| 3-Hydroxybutyrate      | 1,204 ; 2,313 ; 2,413 ; 4,157                                         | d(CH3) ; m(CH2) ; m(CH2) ; m(CH)                            | (HMDB0000357) |
| 3-Hydroxyisobutyrate   | 1,073 ; 2,491 ; 3,709                                                 | d(CH3) ; m(CH) ; m(CH2)                                     | (HMDB0000023) |
| 3-Hydroxyisovalerate   | 1,288 ; 2,366                                                         | s(CH3)2 ; s(CH2)                                            | (HMDB0000754) |
| 3-Methyl-2-oxovalerate | 0,897 ; 1,103 ; 1,462 ; 1,704 ; 2,937                                 | t(CH3) ; d(CH3) ; m(CH2) ; m(CH2) ; m(CH)                   | (HMDB0000491) |
| Acetate                | 1,924                                                                 | s(CH3)                                                      | (HMDB0000042) |
| Acetoacetate           | 2,285 ; 3,454                                                         | s(CH3) ; s(CH2)                                             | (HMDB0000060) |
| Acetone                | 2,238                                                                 | s(CH3)2                                                     | (HMDB0001659) |
| Alanine                | 1,485 ; 3,794                                                         | d(CH3) ; q(CH)                                              | (HMDB0000161) |
| Arginine               | 1,656 ; 1,916 ; 3,252 ; 3,775                                         | m(CH2) ; m(CH2) ; t(CH2) ; t(CH)                            | (HMDB0000517) |
| Asparagine             | 2,863 ; 2,949 ; 4,006                                                 | m(CH2) ; m(CH2) ; dd(CH)                                    | (HMDB0000168) |
| Aspartate              | 2,664 ; 2,805 ; 3,907                                                 | dd(CH2) ; dd(CH2) ; dd(CH)                                  | (HMDB0000191) |
| Betaine                | 3,267 ; 3,909                                                         | s(CH3)3 ; s(CH2)                                            | (HMDB0000043) |
| Carnitine              | 2,444 ; 3,229 ; 3,428 ; 4,576                                         | m(CH2) ; s(CH3)3 ; m(CH2) ; m(CH)                           | (HMDB0000062) |
| Choline                | 3,206 ; 3,524 ; 4,073                                                 | s(CH3)3 ; dd(CH2) ; ddd(CH2)                                | (HMDB0000097) |
| Citrate                | 2,539 and 2,674                                                       | d(CH2) and d(CH2)                                           | (HMDB0000094) |
| Creatine               | 3,041 ; 3,935                                                         | s(CH3) ; s(CH2)                                             | (HMDB0000064) |
| Creatinine             | 3,052 ; 4,068                                                         | s(CH3) ; s(CH2)                                             | (HMDB0000562) |
| Dimethylamine          | 2,715                                                                 | s(CH3)2                                                     | (HMDB0000087) |
| Formate                | 8,459                                                                 | s(CH)                                                       | (HMDB0000142) |
| Glucose                | 3,255 ; 3,413 ; 3,469 ; 3,545 ; 3,733 ; 3,836 ; 3,905 ; 4,655 ; 5,243 | dd(CH) ; m(CH) ; m(CH) ; dd(CH) ; m(CH3) ; m(CH3) ; dd(CH)  | (HMDB0000122) |
| Glutamate              | 2,059 ; 2,134 ; 2,355 ; 3,765                                         | m(CH2) ; m(CH2) ; m(CH2) ; dd(CH)                           | (HMDB0000148) |
| Glutamine              | 2,146 ; 2,455 ; 3,779                                                 | m(CH2) ; m(CH2) ; t(CH)                                     | (HMDB0000641) |
| Glycine                | 3,565                                                                 | s(CH2)                                                      | (HMDB0000123) |
| Histidine              | 3,133 ; 3,239 ; 3,992 ; 7,162 ; 8,066                                 | dd(CH2) ; dd(CH2) ; dd(CH) ; s(CH) ; s(CH)                  | (HMDB0000177) |
| Hypoxanthine           | 8,204 ; 8,224                                                         | s(CH) ; s(CH)                                               | (HMDB0000157) |
| Inosine                | 3,845 ; 3,921 ; 4,273 ; 4,436 ; 6,071 ; 8,203 ; 8,321                 | dd(CH2) ; dd(CH2) ; dd(CH) ; dd(CH) ; d(CH) ; s(CH) ; s(CH) | (HMDB0000195) |
| Isobutyrate            | 1,074 ; 2,392                                                         | d(CH3)2 ; m(CH)                                             | (HMDB0001873) |
| Isoleucine             | 0,943 ; 1,014 ; 1,263 ; 1,472 ; 1,985 ; 3,679                         | t(CH3) ; d(CH3) ; m(CH2) ; m(CH2) ; m(CH) ; d(CH)           | (HMDB0000172) |
| Lactate                | 1,333 ; 4,119                                                         | d(CH3) ; q(CH)                                              | (HMDB0000190) |
| Leucine                | 0,965 ; 1,718 ; 3,744                                                 | t(CH3)2 ; m(CH3) ; m(CH)                                    | (HMDB0000687) |
| Lysine                 | 1,443 ; 1,728 ; 1,893 ; 3,036 ; 3,764                                 | m(CH2) ; m(CH2) ; m(CH2) ; t(CH2) ; t(CH)                   | (HMDB0000182) |
| Malonate               | 3,121                                                                 | s(CH2)                                                      | (HMDB0000691) |
| Mannose                | 3,389 ; 3,582 ; 3,668 ; 3,758 ; 3,797 ; 3,823 ; 3,884 ; 3,916 ; 5,192 | ddd(CH) ; t(CH) ; m(CH2) ; m(CH2) ; m(CH) ; m(CH) ; dd(CH)  | (HMDB0000169) |
| Methanol               | 3,364                                                                 | s(CH3)                                                      | (HMDB0001875) |
| Methionine             | 2,143 ; 2,649 ; 3,869                                                 | s(CH3)m(CH2) ; t(CH2) ; dd(CH)                              | (HMDB0000696) |
| Myo-inositol           | 3,289 ; 3,543 ; 3,631 ; 4,066                                         | t(CH) ; dd(CH2) ; t(CH2) ; t(CH)                            | (HMDB0000211) |
| N,N-Dimethylglycine    | 2,933 ; 3,729                                                         | s(CH3)2 ; s(CH2)                                            | (HMDB0000092) |
| O-Acetylcarnitine      | 2,149 ; 2,515 ; 2,648 ; 3,197 ; 3,611 ; 3,856 ; 5,607                 | s(CH3) ; dd(CH2) ; dd(CH2) ; s(CH3)3 ; dd(CH2) ; q(CH)      | (HMDB0000201) |
| Ornithine              | 1,752 ; 1,841 ; 1,946 ; 3,066 ; 3,789                                 | m(CH2) ; m(CH2) ; m(CH2) ; t(CH2) ; t(CH)                   | (HMDB0000214) |
| Phenylalanine          | 3,137 ; 4,002 ; 7,336 ; 7,384 ; 7,435                                 | m(CH2) ; dd(CH) ; d(CH2) ; t(CH) ; t(CH2)                   | (HMDB0000159) |
| Proline                | 2,009 ; 2,069 ; 2,355 ; 3,346 ; 3,428 ; 4,139                         | m(CH2) ; m(CH2) ; m(CH2) ; dt(CH2) ; dt(CH2) ; dd(CH)       | (HMDB0000162) |
| Pyruvate               | 2,379                                                                 | s(CH3)                                                      | (HMDB0000243) |
| Sarcosine              | 2,745 ; 3,619                                                         | s(CH3) ; s(CH2)                                             | (HMDB0000271) |
| Serine                 | 3,849 ; 3,948 ; 3,965 ; 3,992 ; 4,009                                 | dd(CH) ; d(CH2) ; d(CH2) ; d(CH2) ; d(CH2)                  | (HMDB0000187) |
| Succinate              | 2,411                                                                 | s(CH2)2                                                     | (HMDB0000254) |
| Taurine                | 3,273 ; 3,431                                                         | t(CH2) ; t(CH2)                                             | (HMDB0000251) |
| Threonine              | 1,333 ; 3,601 ; 4,263                                                 | d(CH3) ; d(CH) ; m(CH)                                      | (HMDB0000167) |
| Trimethylamine N-oxide | 3,252                                                                 | s(CH3)3                                                     | (HMDB0000925) |
| Tryptophan             | 3,312 ; 3,489 ; 4,066 ; 7,218 ; 7,289 ; 7,327 ; 7,552 ; 7,741         | dd(CH2) ; dd(CH2) ; dd(CH) ; t(CH) ; t(CH) ; s(CH) ; d(CH)  | (HMDB0000929) |
| Tyrosine               | 3,064 ; 3,204 ; 3,951 ; 6,909 ; 7,201                                 | dd(CH2) ; dd(CH2) ; dd(CH) ; d(CH2) ; d(CH2)                | (HMDB0000158) |
| Valine                 | 0,995 ; 1,046 ; 2,278 ; 3,619                                         | d(CH3) ; d(CH3) ; m(CH) ; d(CH)                             | (HMDB0000883) |
